# Supplementary material for: Sensitive colorimetric detection of melamine in milk with an aptamer-modified nanogold probe
Source: Royal Society of Chemistry journal article supplement (doi:10.1039/c3ra42138d), 2013-01-01
Supplement: c3ra42138d.pdf [file c3ra42138d.pdf]

## **A sensitive colorimetric detection of melamine in milk with aptamer-modified nanogold probe**

**Haibo Xing<sup>ac</sup>, Shenshan Zhan<sup>ac</sup>, Yuangen Wu<sup>ac</sup>, Lan He<sup>ac</sup>, Pei Zhou<sup>bcd\*</sup>**

<sup>a</sup> *School of Environmental Science and Engineering, Shanghai Jiao Tong University, Shanghai 200240, PR China*

<sup>b</sup> *School of Agriculture and Biology, Shanghai Jiao Tong University, Shanghai 200240, PR China*

<sup>c</sup> *Key Laboratory of Urban Agriculture (South), Ministry of Agriculture, Shanghai 200240, PR China*

<sup>d</sup> *Bor S. Luh Food Safety Research Center, Shanghai 200240, PR China*

*Address correspondence to Pei Zhou, School of Agriculture and Biology, Shanghai Jiao Tong University, Shanghai, 200240, China. E-mail: zhoupei@sjtu.edu.cn; Fax: +86-21-34205762; Tel: +86-21-34205762*

## Supplementary information

### Supplementary figures:

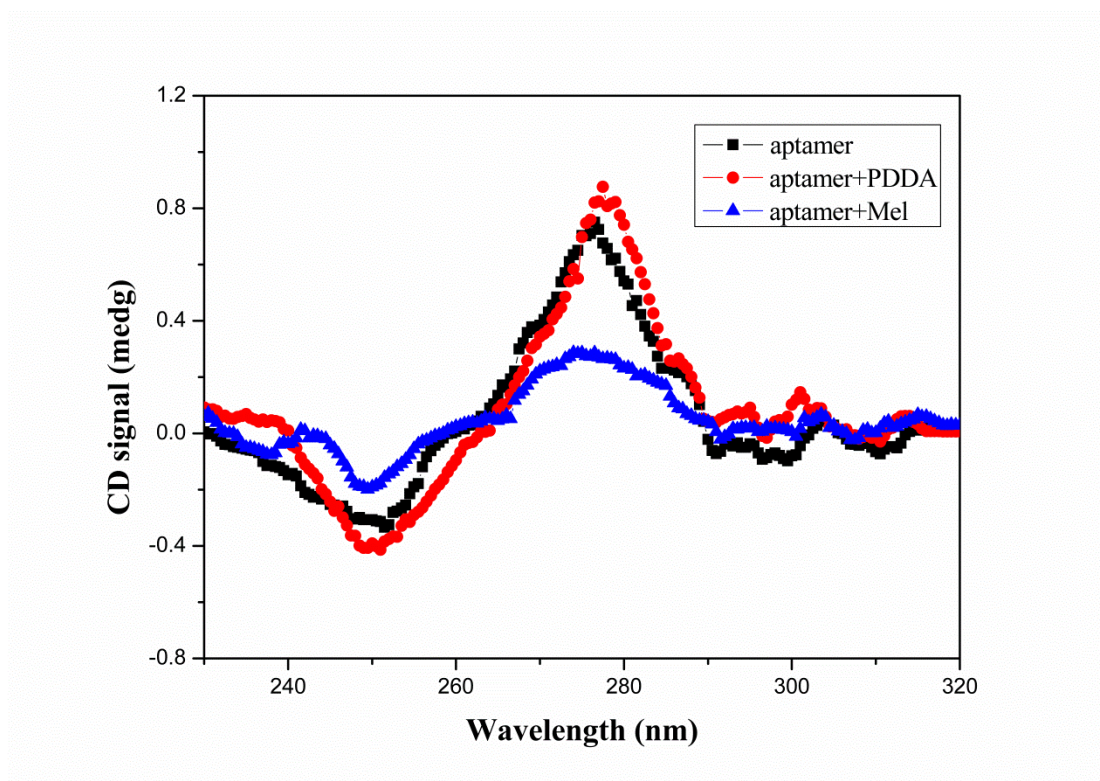

**Fig.S1** CD spectra of 80 nM aptamer solutions treated with PDDA and melamine. The concentrations of PDDA and melamine were 2.0 nM and 4.0  $\mu$ M.

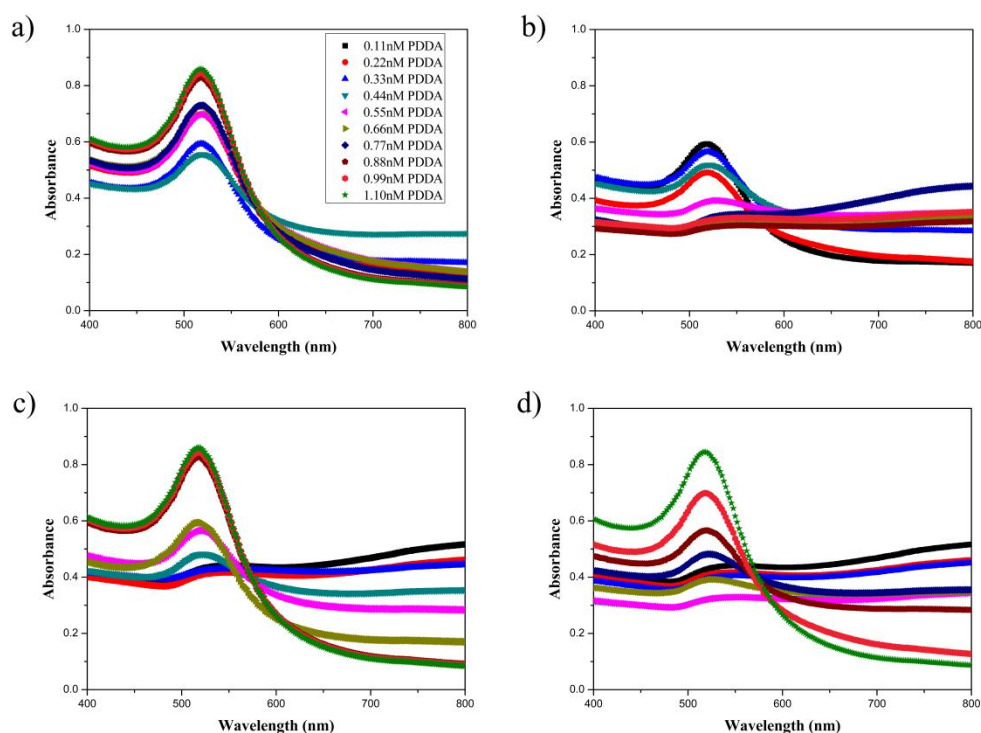

**Fig.S2** Full-range (400 nm-800 nm) absorption spectra of biosensor with different concentrations of PDDA and aptamers. a) 0.4 μM melamine was treated with 0.11, 0.22, 0.33, 0.44, 0.55, 0.66, 0.77, 0.88, 0.99, 1.10 nM PDDA. b) 4.0 μM melamine was treated with 0.11, 0.22, 0.33, 0.44, 0.55, 0.66, 0.77, 0.88, 0.99, 1.10 nM PDDA. c) 0.4 μM melamine was treated with 0, 5, 10, 15, 20, 25, 30, 40, 60, 80 nM aptamers. d) 4.0 μM melamine was treated with 0, 5, 10, 15, 20, 25, 30, 40, 60, 80 nM aptamers.

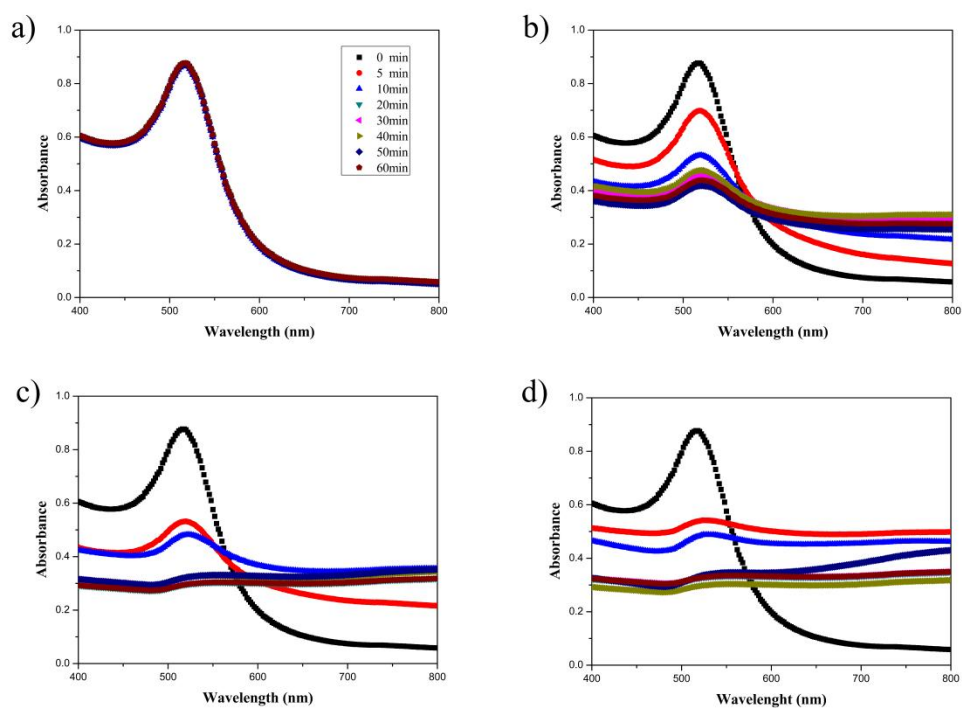

**Fig.S3** Full-range (400 nm-800 nm) absorption spectra of biosensor with different reaction time: 0, 5, 10, 20, 30, 40, 50, 60 min. The concentrations of PDDA and aptamers were 0.44 nM and 25 nM. a) The concentration of melamine was 0  $\mu\text{M}$ . b) The concentration of melamine was 0.4  $\mu\text{M}$ . c) The concentration of melamine was 1.0  $\mu\text{M}$ . d) The concentration of melamine was 2.0  $\mu\text{M}$ .

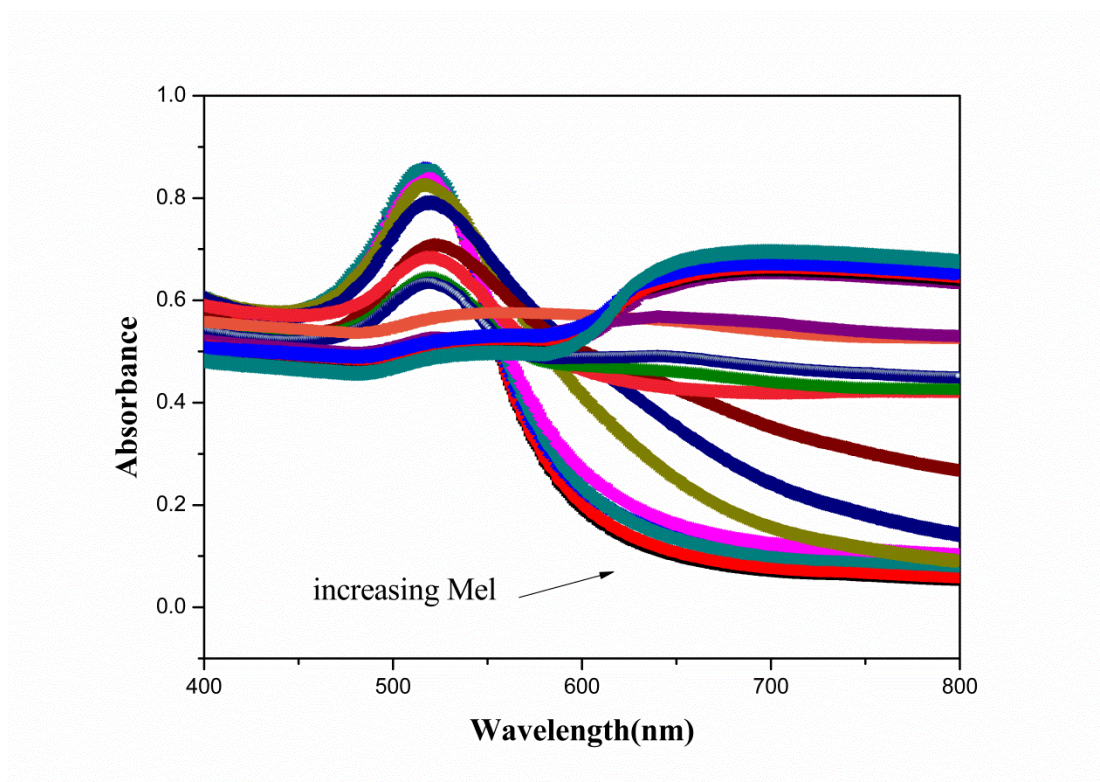

**Fig.S4** The signals of absorbance value from 400 nm to 800 nm. 0, 0.1, 0.2, 0.3, 0.4, 0.5, 0.6, 0.7, 0.8, 0.9, 1.0, 2.0, 3.0, 4.0, 5.0, 6.0, 7.0, 8.0  $\mu\text{M}$  melamine were treated with 0.44 nM PDDA and 25 nM aptamers.
